# Supplementary material
Source: PubMed Central journal article supplement (PMC3579492)
Supplement: NIHMS51995-supplement-2.pdf [file NIHMS51995-supplement-2.pdf]

## Supporting Information for:

# IMPROVEMENT OF THE MODELLING OF THE LOW-TEMPERATURE OXIDATION OF N-BUTANE - STUDY OF THE PRIMARY REACTIONS

*Maximilien CORD<sup>1</sup>, Baptiste SIRJEAN<sup>1</sup>, René FOURNET<sup>1</sup>, Alison TOMLIN<sup>2</sup>, Manuel RUIZ-  
LOPEZ<sup>3</sup>, Frédérique BATTIN-LECLERC<sup>1\*</sup>*

<sup>1</sup>Laboratoire Réactions et Génie des Procédés, CNRS, Nancy Université, ENSIC, 1, rue  
Grandville BP 20451 54001 Nancy Cedex, France

<sup>2</sup>University of Leeds, Leeds LS2 9JT, United Kingdom

<sup>3</sup>Laboratoire Structure et Réactivité des Systèmes Moléculaires Complexes, CNRS, Nancy  
Université, Boulevard des Aiguillettes, BP 70239, 54506 Vandœuvre-lès-Nancy Cedex, France

---

\* E-Mail : Frederique.Battin-Leclerc@ensic.inpl-nancy.fr, Tel : 33 3 83175125, Fax : 33 3  
83378120

Optimized geometries (Cartesian coordinates) at the B3LYP/6-311G(d,p) level of theory.

## Content

### 1) Species of Table 1 and 2

### 2) Species of Tables 3 and 4

2a) Alkylperoxy radicals

2b) Hydroperoxyalkylperoxy radicals

2c) Transition states of the isomerizations of the alkylperoxy radicals

2d) Transition states of the isomerizations of the hydroperoxyalkylperoxy radicals

2e) Hydroperoxyalkyl radicals

2f) Ketohydroperoxydes

2g) Transition states for the formation of cyclic ethers

2h) Cyclic ethers

### 3) Species involved in the isomerization of one hydroperoxyalkyl radical into another hydroperoxyalkyl radical

### 4) Species involved in the beta-scission reactions

### 1) Species of Table 1 and 2

1-propyl radical

|   |           |           |           |
|---|-----------|-----------|-----------|
| C | -1.30123  | -0.286193 | 0.020152  |
| H | -2.26778  | 0.188613  | -0.097757 |
| H | -1.28225  | -1.35711  | 0.18863   |
| C | -0.057894 | 0.524517  | 0.146217  |
| H | 0.021679  | 0.929209  | 1.17087   |
| H | -0.125382 | 1.41015   | -0.498395 |
| C | 1.22409   | -0.256275 | -0.172081 |
| H | 2.11178   | 0.368443  | -0.042631 |
| H | 1.21418   | -0.621585 | -1.20252  |
| H | 1.32665   | -1.12319  | 0.487553  |

2-propyl radical

|   |           |           |          |
|---|-----------|-----------|----------|
| C | -0.010383 | -0.197518 | 1.29797  |
| C | -0.010383 | 0.535062  | 0        |
| H | -0.223134 | 0.463766  | 2.14173  |
| H | -0.752102 | -1.0062   | 1.30443  |
| H | 0.962717  | -0.676058 | 1.50346  |
| C | -0.010383 | -0.197518 | -1.29797 |
| H | 0.211936  | 1.59682   | 0        |
| H | -0.223134 | 0.463766  | -2.14173 |
| H | 0.962717  | -0.676058 | -1.50346 |
| H | -0.752102 | -1.0062   | -1.30443 |

#### 1-butyl radical

|   |           |           |           |
|---|-----------|-----------|-----------|
| C | -1.99842  | 0.130304  | -0.01222  |
| H | -2.86743  | -0.446258 | -0.304842 |
| H | -2.16374  | 1.12827   | 0.378158  |
| C | -0.644866 | -0.488785 | 0.03593   |
| H | -0.54877  | -1.23958  | -0.759713 |
| H | -0.524646 | -1.05793  | 0.976138  |
| C | 0.509102  | 0.521427  | -0.065348 |
| H | 0.403543  | 1.26232   | 0.73605   |
| H | 0.416522  | 1.07407   | -1.0067   |
| C | 1.8907    | -0.131817 | 0.017914  |
| H | 2.0369    | -0.853758 | -0.791685 |
| H | 2.68832   | 0.612401  | -0.054365 |
| H | 2.01986   | -0.666501 | 0.964264  |

#### 2-butyl radical

|   |           |           |           |
|---|-----------|-----------|-----------|
| C | -0.570938 | -0.505259 | 0.092413  |
| C | 0.581185  | 0.442779  | 0.051401  |
| H | -0.436795 | -1.27873  | -0.677416 |
| H | -0.567278 | -1.06058  | 1.04836   |
| C | 1.98527   | -0.042637 | -0.068456 |
| H | 0.407202  | 1.47632   | 0.336947  |
| H | 2.68057   | 0.769494  | -0.295279 |
| H | 2.34076   | -0.517476 | 0.862161  |
| H | 2.08408   | -0.803326 | -0.852905 |
| C | -1.93705  | 0.168678  | -0.082527 |
| H | -2.75015  | -0.560437 | -0.031569 |
| H | -2.10849  | 0.913972  | 0.700235  |
| H | -2.00069  | 0.679398  | -1.04752  |

#### 1-propylperoxy radical

|   |           |          |           |
|---|-----------|----------|-----------|
| C | -4.80E-05 | 2.00E-06 | -0.000281 |
|---|-----------|----------|-----------|

|   |           |           |           |
|---|-----------|-----------|-----------|
| C | -0.000156 | -0.00022  | 1.53053   |
| H | 1.01931   | -0.000875 | 1.92826   |
| H | -0.509246 | 0.884694  | 1.91921   |
| H | -0.51338  | -0.881084 | 1.92245   |
| H | -1.02277  | 0.044449  | -0.385548 |
| H | 0.518697  | 0.886904  | -0.381096 |
| C | 0.674683  | -1.21824  | -0.611947 |
| O | -0.025569 | -2.45428  | -0.258596 |
| H | 0.701424  | -1.17028  | -1.70187  |
| H | 1.68129   | -1.37891  | -0.219436 |
| O | -1.18977  | -2.5404   | -0.871063 |

### 2-propylperoxy radical

|   |           |           |          |
|---|-----------|-----------|----------|
| O | -0.001032 | -0.003536 | 4.90E-05 |
| O | -0.00015  | 0.001065  | 1.31585  |
| C | 1.37065   | 0.000561  | 1.87134  |
| H | 1.89027   | -0.80646  | 1.34898  |
| C | 2.02778   | 1.33906   | 1.57906  |
| H | 1.4938    | 2.14959   | 2.08202  |
| H | 3.06223   | 1.33321   | 1.93218  |
| H | 2.029     | 1.52798   | 0.504841 |
| C | 1.20025   | -0.315889 | 3.34636  |
| H | 0.688018  | -1.27006  | 3.48386  |
| H | 2.1789    | -0.376283 | 3.82802  |
| H | 0.620211  | 0.465     | 3.84447  |

### 1-butylperoxy radical

|   |           |          |           |
|---|-----------|----------|-----------|
| C | -0.011917 | 0.015319 | 0.002751  |
| H | 0.072767  | -0.07014 | 1.08738   |
| H | 0.981314  | 0.098691 | -0.444098 |
| C | -0.828702 | -1.11686 | -0.599497 |
| H | -1.83252  | -1.07514 | -0.164398 |
| H | -0.381167 | -2.06105 | -0.266065 |
| O | -0.615927 | 1.32033  | -0.273114 |
| O | -1.72847  | 1.49154  | 0.412903  |
| C | -0.908031 | -1.08467 | -2.12997  |
| H | 0.105062  | -1.14318 | -2.54599  |
| H | -1.31522  | -0.11956 | -2.447    |
| C | -1.76376  | -2.21757 | -2.70212  |
| H | -2.79113  | -2.16249 | -2.32979  |
| H | -1.80343  | -2.17124 | -3.79335  |
| H | -1.36297  | -3.19784 | -2.42544  |

## 2-butylperoxy radical

|   |           |           |          |
|---|-----------|-----------|----------|
| O | -0.114559 | 0.128016  | 0.024403 |
| O | -0.064538 | 0.153123  | 1.33922  |
| C | 1.31792   | 0.025112  | 1.84761  |
| H | 1.75786   | -0.798033 | 1.27794  |
| C | 2.05942   | 1.32406   | 1.57791  |
| H | 1.60837   | 2.15063   | 2.13314  |
| H | 3.10471   | 1.22984   | 1.88299  |
| H | 2.02923   | 1.55603   | 0.512347 |
| C | 1.18005   | -0.335591 | 3.32129  |
| H | 2.18259   | -0.31251  | 3.76143  |
| H | 0.605787  | 0.454991  | 3.81682  |
| C | 0.528152  | -1.69932  | 3.56671  |
| H | 0.44549   | -1.90388  | 4.63674  |
| H | -0.474985 | -1.73667  | 3.13749  |
| H | 1.11666   | -2.5048   | 3.11738  |

## 1-hydroperoxy-2-propyl radical

|   |           |           |           |
|---|-----------|-----------|-----------|
| H | 0.003182  | -0.054565 | -0.006882 |
| O | -0.003429 | 0.025594  | 0.956595  |
| O | 1.42966   | 0.012702  | 1.22668   |
| C | 1.78214   | 1.33028   | 1.7077    |
| C | 3.20096   | 1.26425   | 2.14172   |
| H | 1.11561   | 1.57291   | 2.54506   |
| H | 1.62955   | 2.06349   | 0.907776  |
| C | 3.60529   | 0.49151   | 3.34746   |
| H | 3.96737   | 1.61673   | 1.46018   |
| H | 3.7653    | -0.570645 | 3.10689   |
| H | 4.54045   | 0.865215  | 3.77463   |
| H | 2.83042   | 0.519995  | 4.11997   |

## 1-hydroperoxy-3-propyl radical

|   |           |           |           |
|---|-----------|-----------|-----------|
| H | -0.005512 | -0.049826 | -0.031408 |
| O | -0.021871 | -0.043466 | 0.935227  |
| O | 1.40794   | 0.005047  | 1.20817   |
| C | 1.76206   | -1.22302  | 1.83892   |
| H | 2.85384   | -1.16005  | 1.88904   |
| H | 1.48226   | -2.06321  | 1.19213   |
| C | 1.15933   | -1.38353  | 3.23692   |
| H | 1.45076   | -2.36631  | 3.62731   |
| H | 0.06484   | -1.42185  | 3.11752   |
| C | 1.5486    | -0.300466 | 4.18072   |
| H | 1.56377   | -0.472628 | 5.24937   |

|   |         |          |         |
|---|---------|----------|---------|
| H | 1.65686 | 0.714271 | 3.81967 |
|---|---------|----------|---------|

2-hydroperoxy-1-propyl radical

|   |           |           |          |
|---|-----------|-----------|----------|
| H | -0.015472 | 0.007542  | 0.01203  |
| O | 0.000903  | 0.009673  | 0.978191 |
| O | 1.44156   | -0.004339 | 1.20893  |
| C | 1.74726   | -1.21158  | 1.94395  |
| H | 1.01217   | -1.26802  | 2.7628   |
| C | 3.10725   | -0.987213 | 2.49711  |
| H | 3.3362    | -0.04636  | 2.97988  |
| H | 3.87382   | -1.74717  | 2.42354  |
| C | 1.62596   | -2.45371  | 1.06569  |
| H | 2.33703   | -2.40434  | 0.236838 |
| H | 1.83032   | -3.35597  | 1.64859  |
| H | 0.614818  | -2.53089  | 0.663493 |

1-hydroperoxy-2-butyl radical

|   |          |           |           |
|---|----------|-----------|-----------|
| H | 0.041435 | -0.034163 | -0.038886 |
| O | 0.023915 | -0.041318 | 0.927758  |
| O | 1.45356  | -0.009187 | 1.21249   |
| C | 1.73785  | 1.27678   | 1.81118   |
| C | 3.15817  | 1.24505   | 2.24438   |
| H | 1.05848  | 1.41036   | 2.66223   |
| H | 1.54885  | 2.06877   | 1.07779   |
| C | 3.60436  | 0.40521   | 3.39223   |
| H | 3.90954  | 1.67675   | 1.59025   |
| H | 3.67319  | -0.645195 | 3.06419   |
| H | 2.82677  | 0.405048  | 4.16701   |
| C | 4.95073  | 0.834398  | 3.98883   |
| H | 5.24658  | 0.174034  | 4.80778   |
| H | 5.74196  | 0.803059  | 3.2339    |
| H | 4.90198  | 1.85478   | 4.37868   |

1-hydroperoxy-3-butyl radical

|   |           |           |          |
|---|-----------|-----------|----------|
| H | -0.019542 | -0.001948 | 0.028619 |
| O | 0.006084  | 0.017728  | 0.994861 |
| O | 1.44689   | -0.006049 | 1.20615  |
| C | 1.76623   | -1.24927  | 1.82776  |
| H | 2.86113   | -1.2377   | 1.83272  |
| H | 1.42229   | -2.07541  | 1.19398  |
| C | 1.21647   | -1.37988  | 3.24798  |
| H | 1.47625   | -2.37895  | 3.62582  |
| H | 0.116     | -1.36738  | 3.18174  |

|   |         |           |         |
|---|---------|-----------|---------|
| C | 1.70615 | -0.324376 | 4.18147 |
| H | 1.91154 | 0.65571   | 3.7648  |
| C | 1.56881 | -0.472692 | 5.65763 |
| H | 1.88148 | -1.46785  | 5.99755 |
| H | 2.15973 | 0.27124   | 6.19793 |
| H | 0.52328 | -0.351193 | 5.98933 |

1-hydroperoxy-4-butyl radical

|   |           |           |           |
|---|-----------|-----------|-----------|
| H | 0.036716  | 0.020616  | -0.056082 |
| O | -0.011567 | 0.036757  | 0.90935   |
| O | 1.40796   | -0.015338 | 1.23048   |
| C | 1.74901   | 1.22413   | 1.85143   |
| H | 1.505     | 2.05126   | 1.17406   |
| H | 2.83948   | 1.15237   | 1.93611   |
| C | 1.10222   | 1.42352   | 3.21728   |
| H | 0.017011  | 1.45701   | 3.08981   |
| H | 1.40846   | 2.40682   | 3.5954    |
| C | 1.47361   | 0.334531  | 4.23401   |
| H | 2.57476   | 0.31061   | 4.33487   |
| H | 1.20666   | -0.646145 | 3.82563   |
| C | 0.84673   | 0.52563   | 5.57093   |
| H | 0.741402  | -0.303759 | 6.25943   |
| H | 0.603297  | 1.51736   | 5.93539   |

2-hydroperoxy-1-butyl radical

|   |           |           |           |
|---|-----------|-----------|-----------|
| C | -0.007536 | 0.044783  | -0.06192  |
| H | -0.080637 | 0.113573  | 1.03426   |
| C | 1.42182   | -0.042256 | -0.467617 |
| H | 2.12603   | 0.702474  | -0.115198 |
| H | 1.77264   | -0.806    | -1.15032  |
| O | -0.580423 | 1.33458   | -0.411333 |
| O | -0.616683 | 1.44984   | -1.86092  |
| H | 0.164161  | 1.99824   | -2.01681  |
| C | -0.866612 | -1.11898  | -0.559863 |
| H | -0.831301 | -1.12358  | -1.65281  |
| H | -0.393967 | -2.04808  | -0.221468 |
| C | -2.3168   | -1.05503  | -0.078741 |
| H | -2.89641  | -1.89181  | -0.476592 |
| H | -2.37652  | -1.09778  | 1.01356   |
| H | -2.79036  | -0.12696  | -0.403129 |

2-hydroperoxy-3-butyl radical

|   |          |          |          |
|---|----------|----------|----------|
| H | -0.05462 | -0.13997 | 0.114237 |
|---|----------|----------|----------|

|   |          |           |           |
|---|----------|-----------|-----------|
| O | 0.0195   | -0.074005 | 1.07547   |
| O | 1.47217  | 0.022734  | 1.21589   |
| C | 1.77867  | 1.33044   | 1.77656   |
| C | 3.19435  | 1.22292   | 2.22706   |
| H | 1.11604  | 1.45424   | 2.64417   |
| C | 3.59105  | 0.326048  | 3.34611   |
| H | 3.96489  | 1.66782   | 1.60525   |
| H | 3.77142  | -0.700011 | 2.99172   |
| H | 4.51305  | 0.664185  | 3.8281    |
| H | 2.80441  | 0.257076  | 4.1039    |
| C | 1.52949  | 2.43945   | 0.762151  |
| H | 0.487666 | 2.42693   | 0.437629  |
| H | 1.73679  | 3.41752   | 1.20463   |
| H | 2.17454  | 2.30816   | -0.111257 |

#### 2-hydroperoxy-4-butyl radical

|   |           |           |           |
|---|-----------|-----------|-----------|
| H | -0.047149 | 0.104983  | 0.095828  |
| O | 0.016655  | 0.112624  | 1.05995   |
| O | 1.46121   | -0.013864 | 1.22035   |
| C | 1.7438    | -1.2895   | 1.81992   |
| H | 2.83607   | -1.2318   | 1.89223   |
| C | 1.15142   | -1.39205  | 3.2344    |
| H | 1.40015   | -2.37726  | 3.64587   |
| H | 0.05456   | -1.37892  | 3.12868   |
| C | 1.60252   | -0.310224 | 4.15147   |
| H | 1.62011   | -0.46308  | 5.22309   |
| H | 1.76106   | 0.689272  | 3.76792   |
| C | 1.34547   | -2.44744  | 0.910077  |
| H | 1.77828   | -2.31588  | -0.084844 |
| H | 1.70754   | -3.39535  | 1.31637   |
| H | 0.259495  | -2.50995  | 0.815935  |

#### 1-hydroperoxy-2-propylperoxy radical

|   |           |           |           |
|---|-----------|-----------|-----------|
| O | -2.02499  | -0.305757 | 0.706566  |
| H | -1.82638  | 0.645583  | 0.759943  |
| O | -1.46828  | -0.584081 | -0.603173 |
| C | -0.170635 | -1.11308  | -0.426181 |
| H | 0.170883  | -1.29981  | -1.4488   |
| H | -0.206833 | -2.06312  | 0.122451  |
| C | 0.797924  | -0.175259 | 0.299146  |
| H | 0.447035  | 0.005085  | 1.31549   |
| O | 0.801765  | 1.13332   | -0.365014 |
| O | -0.248544 | 1.86437   | -0.045288 |



|   |         |           |           |
|---|---------|-----------|-----------|
| C | 2.23234 | -0.670662 | 0.275227  |
| H | 2.29679 | -1.64873  | 0.757514  |
| H | 2.59495 | -0.767117 | -0.750926 |
| H | 2.88619 | 0.019315  | 0.810451  |

1-hydroperoxy-3-propylperoxy radical

|   |           |           |           |
|---|-----------|-----------|-----------|
| C | 0.004474  | 0.004355  | -0.000871 |
| C | 0.006421  | -0.004674 | 1.53167   |
| C | 1.41942   | 0.013181  | -0.591735 |
| O | 1.64454   | -1.10968  | -1.51047  |
| O | 1.58604   | -2.27796  | -0.909801 |
| O | 0.847213  | -1.01117  | 2.0764    |
| O | 0.280392  | -2.29773  | 1.72147   |
| H | -1.01384  | -0.117358 | 1.91281   |
| H | 0.432307  | 0.918885  | 1.93795   |
| H | 2.18177   | -0.073001 | 0.184049  |
| H | 1.62084   | 0.877474  | -1.2235   |
| H | 0.807005  | -2.50877  | 0.928194  |
| H | -0.514925 | -0.888633 | -0.353396 |
| H | -0.569145 | 0.864842  | -0.355336 |

2-hydroperoxy-1-propylperoxy radical

|   |           |           |           |
|---|-----------|-----------|-----------|
| O | 0.42166   | 1.67059   | -0.504114 |
| H | -0.548076 | 1.68914   | -0.585745 |
| O | 0.529494  | 0.931787  | 0.740987  |
| C | 0.772374  | -0.440928 | 0.443864  |
| H | 0.731424  | -0.890336 | 1.4419    |
| C | -0.339684 | -1.04547  | -0.418051 |
| H | -0.233164 | -2.12909  | -0.481287 |
| H | -0.354407 | -0.60719  | -1.41566  |
| O | -1.65098  | -0.848324 | 0.175417  |
| O | -2.1123   | 0.371853  | -0.027201 |
| C | 2.14181   | -0.666873 | -0.192712 |
| H | 2.33632   | -1.73215  | -0.345042 |
| H | 2.20127   | -0.154688 | -1.15415  |
| H | 2.91663   | -0.263278 | 0.46066   |

1-hydroperoxy-2-butylperoxy radical

|   |           |           |           |
|---|-----------|-----------|-----------|
| O | -2.31775  | -0.204566 | 0.95648   |
| H | -2.06364  | 0.735104  | 0.948195  |
| O | -1.99924  | -0.542431 | -0.417514 |
| C | -0.715688 | -1.13261  | -0.438209 |
| H | -0.558865 | -1.36587  | -1.49561  |

|   |           |           |           |
|---|-----------|-----------|-----------|
| H | -0.704796 | -2.06279  | 0.144012  |
| C | 0.401341  | -0.224599 | 0.083533  |
| H | 0.238533  | -0.004633 | 1.1398    |
| O | 0.34067   | 1.06644   | -0.612204 |
| O | -0.596784 | 1.85967   | -0.131153 |
| C | 1.79413   | -0.786945 | -0.166597 |
| H | 1.80564   | -1.82063  | 0.194941  |
| H | 1.96017   | -0.83327  | -1.24823  |
| C | 2.90809   | 0.018928  | 0.507131  |
| H | 3.88647   | -0.414556 | 0.288375  |
| H | 2.91103   | 1.05241   | 0.154873  |
| H | 2.78301   | 0.032689  | 1.59363   |

1-hydroperoxy-3-butylperoxy radical

|   |           |           |           |
|---|-----------|-----------|-----------|
| C | 0.000696  | -0.000213 | 0.000371  |
| C | 0.00012   | -0.000133 | 1.53238   |
| C | 1.4189    | 0.00025   | -0.59061  |
| O | 1.5859    | -1.13929  | -1.52846  |
| O | 1.48033   | -2.31005  | -0.942671 |
| O | 0.808989  | -1.03069  | 2.08338   |
| O | 0.211856  | -2.30157  | 1.72163   |
| H | -1.02362  | -0.080145 | 1.91271   |
| H | 0.453587  | 0.911312  | 1.93667   |
| H | 2.152     | -0.189402 | 0.196063  |
| H | 0.72455   | -2.51684  | 0.920175  |
| H | -0.525827 | -0.892379 | -0.342204 |
| H | -0.566962 | 0.862302  | -0.36124  |
| C | 1.78045   | 1.22646   | -1.40665  |
| H | 2.79314   | 1.14872   | -1.80634  |
| H | 1.08346   | 1.3585    | -2.23782  |
| H | 1.72879   | 2.11412   | -0.771469 |

1-hydroperoxy-4-butylperoxy radical

|   |           |          |           |
|---|-----------|----------|-----------|
| C | -1.77218  | 0.724078 | -0.042023 |
| H | -2.04999  | 1.49628  | 0.684394  |
| H | -2.62105  | 0.555689 | -0.712363 |
| C | -0.535241 | 1.13947  | -0.838773 |
| H | -0.826344 | 1.9778   | -1.48141  |
| H | -0.255985 | 0.326512 | -1.51447  |
| C | 0.671243  | 1.57849  | 0.005371  |
| H | 1.41288   | 2.06263  | -0.638062 |
| H | 0.355142  | 2.33587  | 0.733724  |
| C | 1.37849   | 0.481044 | 0.796793  |

|   |           |           |           |
|---|-----------|-----------|-----------|
| H | 0.697171  | -0.115367 | 1.40009   |
| H | 2.17765   | 0.896304  | 1.41326   |
| O | -1.58774  | -0.433664 | 0.772164  |
| O | -1.49263  | -1.57844  | -0.11245  |
| H | -0.525361 | -1.6988   | -0.154127 |
| O | 2.09377   | -0.431544 | -0.101514 |
| O | 1.38435   | -1.47827  | -0.465605 |

2-hydroperoxy-1-butylperoxy radical

|   |           |           |           |
|---|-----------|-----------|-----------|
| O | 0.127679  | 1.69581   | 0.575188  |
| H | 1.10078   | 1.67335   | 0.552855  |
| O | -0.143025 | 0.947479  | -0.6397   |
| C | -0.398228 | -0.413548 | -0.297923 |
| H | -0.480592 | -0.873842 | -1.28957  |
| C | 0.7804    | -1.0446   | 0.44773   |
| H | 0.648606  | -2.12364  | 0.534537  |
| H | 0.916391  | -0.598701 | 1.43265   |
| O | 2.02657   | -0.895197 | -0.284997 |
| O | 2.54591   | 0.310691  | -0.148918 |
| C | -1.70389  | -0.594159 | 0.484392  |
| H | -1.81886  | -1.65487  | 0.736209  |
| H | -1.61248  | -0.048429 | 1.42757   |
| C | -2.92735  | -0.100922 | -0.291232 |
| H | -3.83314  | -0.195564 | 0.312224  |
| H | -2.80842  | 0.948087  | -0.567243 |
| H | -3.07492  | -0.677324 | -1.20962  |

2-hydroperoxy-3-butylperoxy radical

|   |           |           |           |
|---|-----------|-----------|-----------|
| O | 2.06987   | -0.081092 | 0.897085  |
| H | 1.97706   | -0.962184 | 0.494056  |
| O | 1.43181   | 0.711821  | -0.133091 |
| C | 0.078427  | 0.967565  | 0.236194  |
| H | 0.064434  | 1.52463   | 1.18331   |
| C | -0.700634 | -0.337674 | 0.489015  |
| H | -0.203411 | -0.887205 | 1.28785   |
| O | -0.628368 | -1.20061  | -0.696579 |
| O | 0.515502  | -1.85314  | -0.779689 |
| C | -0.458932 | 1.82824   | -0.901582 |
| H | -1.4512   | 2.21438   | -0.662373 |
| H | 0.209506  | 2.67586   | -1.05827  |
| H | -0.513911 | 1.2533    | -1.82733  |
| C | -2.17689  | -0.147374 | 0.788141  |
| H | -2.63568  | -1.09967  | 1.05838   |

|   |          |          |           |
|---|----------|----------|-----------|
| H | -2.30085 | 0.542461 | 1.6265    |
| H | -2.70832 | 0.258068 | -0.074535 |

2-hydroperoxy-4-butylperoxy radical

|   |           |           |           |
|---|-----------|-----------|-----------|
| C | 6.50E-05  | 0.000207  | -7.50E-05 |
| C | 0.000223  | -3.00E-05 | 1.53957   |
| C | 1.40985   | -0.000299 | -0.602341 |
| O | 1.60009   | -1.10177  | -1.55458  |
| O | 1.54549   | -2.28292  | -0.978781 |
| O | 0.84737   | -1.03042  | 2.0551    |
| O | 0.288106  | -2.31181  | 1.67582   |
| H | -1.02256  | -0.190087 | 1.88397   |
| H | 2.17667   | -0.128688 | 0.162641  |
| H | 1.62773   | 0.876957  | -1.21001  |
| H | 0.80829   | -2.50432  | 0.873467  |
| H | -0.51791  | -0.898611 | -0.339033 |
| H | -0.578626 | 0.853676  | -0.362459 |
| C | 0.525383  | 1.28679   | 2.16751   |
| H | -0.103942 | 2.13042   | 1.87411   |
| H | 0.512365  | 1.20467   | 3.25537   |
| H | 1.55246   | 1.49722   | 1.85747   |

2) Species of Tables 3 and 4

2a) Alkylperoxy radicals

CH<sub>3</sub>CH<sub>2</sub>OO.

|   |           |           |           |
|---|-----------|-----------|-----------|
| C | 0.001455  | 0.001572  | -0.001286 |
| H | 0.002078  | 0.00462   | 1.08971   |
| H | 1.03745   | -0.001377 | -0.349976 |
| H | -0.481087 | 0.914084  | -0.358113 |
| C | -0.718674 | -1.22906  | -0.517114 |
| H | -0.800012 | -1.24319  | -1.60526  |
| H | -0.26158  | -2.1561   | -0.166805 |
| O | -2.11246  | -1.24746  | -0.073414 |
| O | -2.20391  | -1.49485  | 1.21781   |

CH<sub>3</sub>CH<sub>2</sub>CH<sub>2</sub>OO.

|   |           |           |           |
|---|-----------|-----------|-----------|
| C | -4.80E-05 | 2.00E-06  | -0.000281 |
| C | -0.000156 | -0.00022  | 1.53053   |
| H | 1.01931   | -0.000875 | 1.92826   |
| H | -0.509246 | 0.884694  | 1.91921   |
| H | -0.51338  | -0.881084 | 1.92245   |
| H | -1.02277  | 0.044449  | -0.385548 |
| H | 0.518697  | 0.886904  | -0.381096 |
| C | 0.674683  | -1.21824  | -0.611947 |
| O | -0.025569 | -2.45428  | -0.258596 |
| H | 0.701424  | -1.17028  | -1.70187  |
| H | 1.68129   | -1.37891  | -0.219436 |
| O | -1.18977  | -2.5404   | -0.871063 |

CH<sub>3</sub>CH<sub>2</sub>CH<sub>2</sub>CH<sub>2</sub>OO.

|   |           |          |           |
|---|-----------|----------|-----------|
| C | -0.011917 | 0.015319 | 0.002751  |
| H | 0.072767  | -0.07014 | 1.08738   |
| H | 0.981314  | 0.098691 | -0.444098 |
| C | -0.828702 | -1.11686 | -0.599497 |
| H | -1.83252  | -1.07514 | -0.164398 |
| H | -0.381167 | -2.06105 | -0.266065 |
| O | -0.615927 | 1.32033  | -0.273114 |
| O | -1.72847  | 1.49154  | 0.412903  |
| C | -0.908031 | -1.08467 | -2.12997  |
| H | 0.105062  | -1.14318 | -2.54599  |
| H | -1.31522  | -0.11956 | -2.447    |
| C | -1.76376  | -2.21757 | -2.70212  |
| H | -2.79113  | -2.16249 | -2.32979  |
| H | -1.80343  | -2.17124 | -3.79335  |
| H | -1.36297  | -3.19784 | -2.42544  |

CH<sub>3</sub>CH<sub>2</sub>CH<sub>2</sub>CH<sub>2</sub>CH<sub>2</sub>OO.

|   |           |           |           |
|---|-----------|-----------|-----------|
| C | -0.010179 | 0.010869  | 0.012751  |
| H | 0.055101  | -0.068511 | 1.09922   |
| H | 0.990952  | 0.088555  | -0.417081 |
| C | -0.820116 | -1.12226  | -0.597032 |
| H | -1.8308   | -1.07426  | -0.179128 |
| H | -0.381132 | -2.06538  | -0.249738 |
| O | -0.604771 | 1.31634   | -0.280949 |
| O | -1.72974  | 1.49429   | 0.382716  |
| C | -0.872501 | -1.09803  | -2.12846  |
| H | 0.147549  | -1.16421  | -2.5288   |
| H | -1.2704   | -0.132673 | -2.45978  |
| C | -1.72306  | -2.22803  | -2.71879  |

|   |           |          |          |
|---|-----------|----------|----------|
| H | -2.74017  | -2.1598  | -2.31504 |
| H | -1.32636  | -3.19403 | -2.38302 |
| C | -1.77844  | -2.20278 | -4.24864 |
| H | -0.779315 | -2.30643 | -4.68325 |
| H | -2.39553  | -3.01671 | -4.63825 |
| H | -2.20107  | -1.26141 | -4.61275 |

(CH<sub>3</sub>)<sub>2</sub>CHCH<sub>2</sub>OO.

|   |           |           |           |
|---|-----------|-----------|-----------|
| C | -0.004086 | -0.000852 | 0.003048  |
| H | -0.01491  | 0.007618  | 1.0961    |
| H | 1.02497   | -0.007512 | -0.361101 |
| C | -0.818501 | -1.1586   | -0.570148 |
| H | -0.83781  | -1.01116  | -1.65569  |
| O | -0.573842 | 1.29481   | -0.356341 |
| O | -0.371969 | 1.57436   | -1.62939  |
| C | -0.10594  | -2.48406  | -0.27057  |
| H | -0.03431  | -2.66106  | 0.807831  |
| H | -0.656959 | -3.32157  | -0.705366 |
| H | 0.906749  | -2.50071  | -0.683183 |
| C | -2.2588   | -1.15279  | -0.044323 |
| H | -2.28126  | -1.31761  | 1.03841   |
| H | -2.75383  | -0.20176  | -0.251034 |
| H | -2.84453  | -1.94702  | -0.514207 |

(CH<sub>3</sub>)<sub>2</sub>CHCH<sub>2</sub>CH<sub>2</sub>OO.

|   |           |           |           |
|---|-----------|-----------|-----------|
| C | -0.017505 | 0.019906  | 0.017847  |
| H | -1.30E-05 | -0.054733 | 1.10649   |
| H | 1.00183   | 0.101833  | -0.36177  |
| C | -0.805598 | -1.11928  | -0.610998 |
| H | -1.82371  | -1.06665  | -0.213109 |
| H | -0.374658 | -2.06128  | -0.247914 |
| O | -0.6033   | 1.32167   | -0.308224 |
| O | -1.75529  | 1.50173   | 0.306852  |
| C | -0.847858 | -1.12814  | -2.15109  |
| H | -1.19172  | -0.139546 | -2.47758  |
| C | -1.86608  | -2.16608  | -2.64204  |
| H | -2.86444  | -1.96321  | -2.24457  |
| H | -1.93346  | -2.16533  | -3.73345  |
| H | -1.5796   | -3.17595  | -2.328    |
| C | 0.531633  | -1.38426  | -2.77411  |
| H | 1.26441   | -0.623937 | -2.4913   |
| H | 0.923719  | -2.36022  | -2.46681  |
| H | 0.469587  | -1.38166  | -3.86568  |

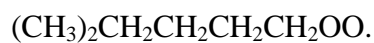

|   |           |           |           |
|---|-----------|-----------|-----------|
| C | -0.004022 | 0.024553  | -0.007905 |
| H | 0.136861  | -0.09803  | 1.06729   |
| H | 0.962982  | 0.154841  | -0.498844 |
| C | -0.816708 | -1.11026  | -0.612007 |
| H | -1.80185  | -1.10607  | -0.133806 |
| H | -0.329096 | -2.04699  | -0.322358 |
| O | -0.657821 | 1.32032   | -0.20266  |
| O | -1.74081  | 1.43029   | 0.540823  |
| C | -0.960179 | -1.01744  | -2.13587  |
| H | 0.032165  | -1.09596  | -2.60107  |
| H | -1.3396   | -0.022005 | -2.3892   |
| C | -1.89178  | -2.07137  | -2.76286  |
| H | -2.86823  | -1.98427  | -2.2672   |
| C | -2.09757  | -1.78071  | -4.25586  |
| H | -1.15088  | -1.85567  | -4.80214  |
| H | -2.79629  | -2.49221  | -4.70497  |
| H | -2.49505  | -0.774257 | -4.41482  |
| C | -1.3843   | -3.50579  | -2.55659  |
| H | -0.394009 | -3.63722  | -3.00733  |
| H | -1.30839  | -3.77027  | -1.49892  |
| H | -2.05858  | -4.22811  | -3.02523  |

2b) Hydroperoxyalkylperoxy radicals

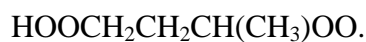

|   |           |           |           |
|---|-----------|-----------|-----------|
| C | 0.000696  | -0.000213 | 0.000371  |
| C | 0.00012   | -0.000133 | 1.53238   |
| C | 1.4189    | 0.00025   | -0.59061  |
| O | 1.5859    | -1.13929  | -1.52846  |
| O | 1.48033   | -2.31005  | -0.942671 |
| O | 0.808989  | -1.03069  | 2.08338   |
| O | 0.211856  | -2.30157  | 1.72163   |
| H | -1.02362  | -0.080145 | 1.91271   |
| H | 0.453587  | 0.911312  | 1.93667   |
| H | 2.152     | -0.189402 | 0.196063  |
| H | 0.72455   | -2.51684  | 0.920175  |
| H | -0.525827 | -0.892379 | -0.342204 |
| H | -0.566962 | 0.862302  | -0.36124  |
| C | 1.78045   | 1.22646   | -1.40665  |
| H | 2.79314   | 1.14872   | -1.80634  |
| H | 1.08346   | 1.3585    | -2.23782  |

|   |         |         |           |
|---|---------|---------|-----------|
| H | 1.72879 | 2.11412 | -0.771469 |
|---|---------|---------|-----------|

HOCH(CH<sub>3</sub>)CH<sub>2</sub>CH<sub>2</sub>OO.

|   |           |           |           |
|---|-----------|-----------|-----------|
| C | 6.50E-05  | 0.000207  | -7.50E-05 |
| C | 0.000223  | -3.00E-05 | 1.53957   |
| C | 1.40985   | -0.000299 | -0.602341 |
| O | 1.60009   | -1.10177  | -1.55458  |
| O | 1.54549   | -2.28292  | -0.978781 |
| O | 0.84737   | -1.03042  | 2.0551    |
| O | 0.288106  | -2.31181  | 1.67582   |
| H | -1.02256  | -0.190087 | 1.88397   |
| H | 2.17667   | -0.128688 | 0.162641  |
| H | 1.62773   | 0.876957  | -1.21001  |
| H | 0.80829   | -2.50432  | 0.873467  |
| H | -0.51791  | -0.898611 | -0.339033 |
| H | -0.578626 | 0.853676  | -0.362459 |
| C | 0.525383  | 1.28679   | 2.16751   |
| H | -0.103942 | 2.13042   | 1.87411   |
| H | 0.512365  | 1.20467   | 3.25537   |
| H | 1.55246   | 1.49722   | 1.85747   |

2c) Transition states of the isomerizations of the alkylperoxy radicals

CH<sub>3</sub>CH<sub>2</sub>OO. → CH<sub>2</sub>(.)CH<sub>2</sub>OOH

|   |           |          |           |
|---|-----------|----------|-----------|
| C | 0         | 0        | 0         |
| H | 0         | 0        | 1.0952    |
| H | 1.0264    | 0        | -0.377064 |
| C | -0.878846 | -1.12611 | -0.533711 |
| H | -0.795624 | -1.34194 | -1.59734  |
| H | -1.04088  | -1.99759 | 0.094657  |
| H | -1.92516  | -0.21637 | -0.420579 |
| O | -0.613871 | 1.19375  | -0.503834 |
| O | -1.98806  | 0.966617 | -0.240437 |

CH<sub>3</sub>CH<sub>2</sub>CH<sub>2</sub>OO. → CH<sub>3</sub>CH(.)CH<sub>2</sub>OOH

|   |           |         |           |
|---|-----------|---------|-----------|
| C | 0         | 0       | 0         |
| H | 0         | 0       | 1.09971   |
| H | 1.04501   | 0       | -0.323109 |
| C | -0.741996 | 1.18624 | -0.538898 |
| C | -0.129434 | 2.58337 | -0.412436 |
| H | -0.615418 | 1.36625 | -1.88832  |
| H | -0.475616 | 3.16133 | 0.449683  |
| H | 0.965437  | 2.51427 | -0.405864 |



|   |           |           |           |
|---|-----------|-----------|-----------|
| O | -0.585211 | 3.27471   | -1.57641  |
| O | -0.358147 | 2.32353   | -2.60654  |
| H | -0.463226 | -0.938076 | -0.315838 |
| H | -1.82414  | 1.16819   | -0.395581 |

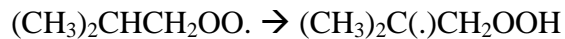

|   |           |          |           |
|---|-----------|----------|-----------|
| C | 0         | 0        | 0         |
| H | 0         | 0        | 1.09995   |
| H | 1.04322   | 0        | -0.326634 |
| C | -0.749392 | 1.19084  | -0.535353 |
| C | -0.071274 | 2.56703  | -0.390555 |
| H | -0.535294 | 1.34997  | -1.86136  |
| H | -0.434132 | 3.16653  | 0.450695  |
| H | 1.01667   | 2.44776  | -0.330992 |
| O | -0.435016 | 3.26723  | -1.57904  |
| O | -0.195551 | 2.29904  | -2.59096  |
| H | -0.464674 | -0.93748 | -0.317355 |
| C | -2.24511  | 1.19724  | -0.331483 |
| H | -2.48538  | 1.26243  | 0.739782  |
| H | -2.70257  | 2.05493  | -0.829006 |
| H | -2.70558  | 0.282115 | -0.712756 |

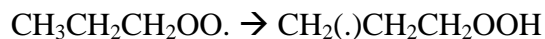

|   |           |           |           |
|---|-----------|-----------|-----------|
| C | 0         | 0         | 0         |
| H | 0         | 0         | 1.40635   |
| H | 1.04702   | 0         | -0.291378 |
| C | -0.780556 | 1.27134   | -0.214088 |
| C | -1.65824  | 1.61023   | 1.01588   |
| H | -0.104354 | 2.1109    | -0.390041 |
| H | -2.08406  | 2.6131    | 0.940136  |
| H | -2.45647  | 0.873318  | 1.15173   |
| O | -0.831152 | 1.63664   | 2.17052   |
| O | -0.433835 | 0.305836  | 2.43063   |
| H | -1.44501  | 1.18878   | -1.08471  |
| H | -0.517505 | -0.935383 | -0.205105 |

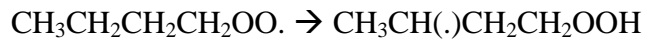

|   |           |           |           |
|---|-----------|-----------|-----------|
| C | -0.000439 | -0.000726 | 0.000236  |
| C | 0.00015   | 0.000263  | 1.50936   |
| H | 1.01521   | -0.000999 | -0.402564 |
| H | -0.521085 | -0.874513 | -0.401971 |
| H | -0.508568 | 0.89153   | -0.391287 |
| H | 0.594031  | -1.18947  | 1.86328   |

|   |           |           |         |
|---|-----------|-----------|---------|
| H | 0.650518  | 0.746758  | 1.96493 |
| C | -1.31742  | -0.218069 | 2.22601 |
| C | -1.61288  | -1.72294  | 2.43185 |
| H | -1.29969  | 0.259056  | 3.2084  |
| H | -2.46493  | -1.87553  | 3.09794 |
| H | -1.79192  | -2.23153  | 1.479   |
| O | -0.506176 | -2.32211  | 3.09109 |
| O | 0.571184  | -2.32488  | 2.17668 |
| H | -2.15044  | 0.217472  | 1.65701 |

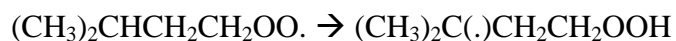

|   |           |           |           |
|---|-----------|-----------|-----------|
| C | 0         | 0         | 0         |
| C | 0         | 0         | 1.51547   |
| H | 1.01739   | 0         | -0.399851 |
| H | -0.520353 | -0.870687 | -0.406536 |
| H | -0.504464 | 0.897819  | -0.384894 |
| H | 0.58486   | -1.18145  | 1.82361   |
| C | -1.34632  | -0.285442 | 2.17081   |
| C | -1.61277  | -1.79942  | 2.3106    |
| H | -1.37709  | 0.154853  | 3.17086   |
| H | -2.48341  | -1.99563  | 2.9404    |
| H | -1.74772  | -2.27939  | 1.33583   |
| O | -0.514382 | -2.39849  | 2.98692   |
| O | 0.59065   | -2.34524  | 2.1072    |
| H | -2.1641   | 0.158959  | 1.58668   |
| C | 0.833108  | 1.08474   | 2.16346   |
| H | 1.83255   | 1.13814   | 1.72402   |
| H | 0.361751  | 2.06919   | 2.02519   |
| H | 0.93899   | 0.920956  | 3.2388    |

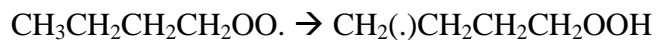

|   |           |           |           |
|---|-----------|-----------|-----------|
| C | -0.000229 | 9.20E-05  | -0.00033  |
| H | 0.000739  | 6.10E-05  | 1.09342   |
| H | 1.03546   | 0.00041   | -0.356518 |
| C | -0.780188 | -1.20723  | -0.524105 |
| H | -1.79972  | -1.16234  | -0.12444  |
| H | -0.315483 | -2.10431  | -0.098888 |
| O | -0.599682 | 1.25791   | -0.337227 |
| O | -0.276524 | 1.57572   | -1.67575  |
| C | -0.833351 | -1.35654  | -2.05815  |
| H | -1.29749  | -2.3242   | -2.29934  |
| H | 0.185922  | -1.40511  | -2.45796  |
| C | -1.59537  | -0.257045 | -2.75562  |

|   |           |           |          |
|---|-----------|-----------|----------|
| H | -1.48507  | -0.194254 | -3.83672 |
| H | -2.61077  | -0.07237  | -2.40484 |
| H | -0.952839 | 0.892123  | -2.29161 |

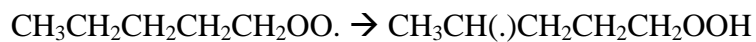

|   |           |           |           |
|---|-----------|-----------|-----------|
| C | 0         | 0         | 0         |
| H | 0         | 0         | 1.09382   |
| H | 1.03594   | 0         | -0.355794 |
| C | -0.778965 | -1.20819  | -0.524396 |
| H | -1.80055  | -1.15966  | -0.130532 |
| H | -0.319172 | -2.10453  | -0.092017 |
| O | -0.600126 | 1.2559    | -0.33914  |
| O | -0.283428 | 1.56727   | -1.67914  |
| C | -0.821998 | -1.36381  | -2.05727  |
| H | -1.27962  | -2.3348   | -2.29998  |
| H | 0.201231  | -1.40799  | -2.45035  |
| C | -1.5837   | -0.270231 | -2.77613  |
| H | -2.58834  | -0.098815 | -2.38042  |
| H | -0.964993 | 0.849345  | -2.29691  |
| C | -1.48366  | -0.22049  | -4.27836  |
| H | -1.93883  | -1.11509  | -4.72817  |
| H | -1.99944  | 0.649881  | -4.69042  |
| H | -0.440991 | -0.190071 | -4.60865  |

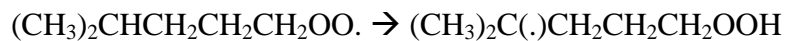

|   |           |           |           |
|---|-----------|-----------|-----------|
| C | 0         | 0         | 0         |
| H | 0         | 0         | 1.09386   |
| H | 1.03546   | 0         | -0.356118 |
| C | -0.782187 | -1.20483  | -0.525954 |
| H | -1.79054  | -1.17989  | -0.100768 |
| H | -0.302563 | -2.10476  | -0.123191 |
| O | -0.597316 | 1.25766   | -0.34439  |
| O | -0.246484 | 1.58165   | -1.67105  |
| C | -0.850552 | -1.34019  | -2.06058  |
| H | -1.34452  | -2.2934   | -2.30491  |
| H | 0.169048  | -1.41968  | -2.45502  |
| C | -1.57249  | -0.220207 | -2.80392  |
| H | -0.921313 | 0.852323  | -2.32307  |
| C | -1.30992  | -0.197822 | -4.29434  |
| H | -1.75807  | -1.07954  | -4.77651  |
| H | -1.74402  | 0.687261  | -4.76643  |
| H | -0.239261 | -0.215327 | -4.51516  |
| C | -3.01032  | 0.032885  | -2.40153  |

|   |          |           |          |
|---|----------|-----------|----------|
| H | -3.43536 | 0.86622   | -2.96585 |
| H | -3.62831 | -0.854944 | -2.60243 |
| H | -3.10283 | 0.26662   | -1.33894 |

2d) Transition states of the isomerizations of the hydroperoxyalkylperoxy radicals

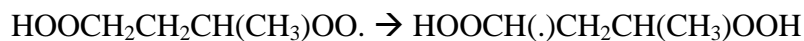

|   |           |          |           |
|---|-----------|----------|-----------|
| C | 0         | 0        | 0         |
| H | 0         | 0        | 1.09597   |
| C | 1.45591   | 0        | -0.526055 |
| H | 1.43005   | 0.109102 | -1.61409  |
| H | 1.98895   | 0.863936 | -0.112435 |
| C | 2.17558   | -1.28786 | -0.193115 |
| H | 1.11349   | -2.09333 | 0.032062  |
| H | 2.73081   | -1.34153 | 0.746165  |
| O | -0.626874 | -1.20921 | -0.438052 |
| O | -0.043814 | -2.27866 | 0.282022  |
| O | 2.92973   | -1.70259 | -1.27885  |
| O | 3.70149   | -2.86311 | -0.884919 |
| H | 3.25975   | -3.5494  | -1.40649  |
| C | -0.830912 | 1.15024  | -0.543632 |
| H | -1.84334  | 1.11029  | -0.138546 |
| H | -0.382263 | 2.10687  | -0.265587 |
| H | -0.890588 | 1.09882  | -1.63349  |

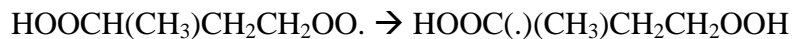

|   |           |           |           |
|---|-----------|-----------|-----------|
| C | 0         | 0         | 0         |
| H | 0         | 0         | 1.09478   |
| H | 1.02883   | 0         | -0.366578 |
| C | -0.788793 | -1.19828  | -0.569577 |
| H | -0.625726 | -1.2433   | -1.64867  |
| H | -0.40827  | -2.12703  | -0.12775  |
| C | -2.28064  | -1.04974  | -0.313617 |
| H | -2.32127  | 0.274604  | -0.104291 |
| O | -0.575007 | 1.21007   | -0.473366 |
| O | -1.82914  | 1.3467    | 0.169975  |
| O | -2.93651  | -1.34619  | -1.51127  |
| O | -4.35693  | -1.07942  | -1.3752   |
| H | -4.42251  | -0.259478 | -1.88678  |
| C | -2.86322  | -1.67628  | 0.932349  |
| H | -3.91053  | -1.40311  | 1.05367   |
| H | -2.79469  | -2.76933  | 0.871136  |
| H | -2.30971  | -1.34019  | 1.81129   |

2e) Hydroperoxyalkyl radicals

CH<sub>2</sub>(.)CH<sub>2</sub>OOH

|   |           |           |           |
|---|-----------|-----------|-----------|
| C | -0.003609 | -0.007514 | 0.008879  |
| H | -0.011775 | -0.007976 | 1.10678   |
| H | 1.04932   | -0.013195 | -0.317029 |
| C | -0.753779 | -1.15376  | -0.551967 |
| H | -1.0594   | -1.13301  | -1.58973  |
| H | -0.950372 | -2.03502  | 0.042612  |
| O | -0.6165   | 1.18651   | -0.493704 |
| O | 0.265219  | 2.2887    | -0.141523 |
| H | -0.313332 | 2.78546   | 0.452694  |

CH<sub>3</sub>CH(.)CH<sub>2</sub>OOH

|   |           |           |           |
|---|-----------|-----------|-----------|
| H | 0.003182  | -0.054565 | -0.006882 |
| O | -0.003429 | 0.025594  | 0.956595  |
| O | 1.42966   | 0.012702  | 1.22668   |
| C | 1.78214   | 1.33028   | 1.7077    |
| C | 3.20096   | 1.26425   | 2.14172   |
| H | 1.11561   | 1.57291   | 2.54506   |
| H | 1.62955   | 2.06349   | 0.907776  |
| C | 3.60529   | 0.49151   | 3.34746   |
| H | 3.96737   | 1.61673   | 1.46018   |
| H | 3.7653    | -0.570645 | 3.10689   |
| H | 4.54045   | 0.865215  | 3.77463   |
| H | 2.83042   | 0.519995  | 4.11997   |

(CH<sub>3</sub>)<sub>2</sub>C(.)CH<sub>2</sub>OOH

|   |           |           |           |
|---|-----------|-----------|-----------|
| C | -0.228821 | 0.201412  | 0.341862  |
| H | -0.703518 | 0.782482  | 1.13994   |
| H | 0.853444  | 0.166914  | 0.517536  |
| C | -0.815774 | -1.16129  | 0.221543  |
| O | -0.477606 | 0.871491  | -0.917482 |
| O | 0.017458  | 2.23892   | -0.785084 |
| C | -0.025147 | -2.25057  | -0.427373 |
| H | -0.297694 | -3.23555  | -0.032978 |
| H | -0.208745 | -2.28789  | -1.51328  |
| H | 1.05052   | -2.10964  | -0.291355 |
| C | -2.28922  | -1.33843  | 0.393932  |
| H | -2.53294  | -2.33591  | 0.77586   |
| H | -2.71113  | -0.593116 | 1.07305   |
| H | -2.81976  | -1.23093  | -0.565334 |

|   |          |         |          |
|---|----------|---------|----------|
| H | 0.769319 | 2.20812 | -1.39209 |
|---|----------|---------|----------|

CH<sub>2</sub>(.)CH<sub>2</sub>CH<sub>2</sub>OOH

|   |           |           |           |
|---|-----------|-----------|-----------|
| H | -0.005512 | -0.049826 | -0.031408 |
| O | -0.021871 | -0.043466 | 0.935227  |
| O | 1.40794   | 0.005047  | 1.20817   |
| C | 1.76206   | -1.22302  | 1.83892   |
| H | 2.85384   | -1.16005  | 1.88904   |
| H | 1.48226   | -2.06321  | 1.19213   |
| C | 1.15933   | -1.38353  | 3.23692   |
| H | 1.45076   | -2.36631  | 3.62731   |
| H | 0.06484   | -1.42185  | 3.11752   |
| C | 1.5486    | -0.300466 | 4.18072   |
| H | 1.56377   | -0.472628 | 5.24937   |
| H | 1.65686   | 0.714271  | 3.81967   |

CH<sub>3</sub>CH(.)CH<sub>2</sub>CH<sub>2</sub>OOH

|   |           |           |          |
|---|-----------|-----------|----------|
| H | -0.019542 | -0.001948 | 0.028619 |
| O | 0.006084  | 0.017728  | 0.994861 |
| O | 1.44689   | -0.006049 | 1.20615  |
| C | 1.76623   | -1.24927  | 1.82776  |
| H | 2.86113   | -1.2377   | 1.83272  |
| H | 1.42229   | -2.07541  | 1.19398  |
| C | 1.21647   | -1.37988  | 3.24798  |
| H | 1.47625   | -2.37895  | 3.62582  |
| H | 0.116     | -1.36738  | 3.18174  |
| C | 1.70615   | -0.324376 | 4.18147  |
| H | 1.91154   | 0.65571   | 3.7648   |
| C | 1.56881   | -0.472692 | 5.65763  |
| H | 1.88148   | -1.46785  | 5.99755  |
| H | 2.15973   | 0.27124   | 6.19793  |
| H | 0.52328   | -0.351193 | 5.98933  |

(CH<sub>3</sub>)<sub>2</sub>C(.)CH<sub>2</sub>CH<sub>2</sub>OOH

|   |           |           |           |
|---|-----------|-----------|-----------|
| H | -0.002507 | 0.017019  | -0.020998 |
| O | -0.016181 | 0.031324  | 0.945522  |
| O | 1.41572   | -0.001614 | 1.214     |
| C | 1.7573    | 1.22922   | 1.84484   |
| H | 1.47293   | 2.06731   | 1.19543   |
| H | 2.84986   | 1.17733   | 1.89383   |
| C | 1.14746   | 1.39886   | 3.25011   |
| H | 0.059471  | 1.41491   | 3.13514   |
| H | 1.45054   | 2.39517   | 3.60103   |

|   |           |           |         |
|---|-----------|-----------|---------|
| C | 1.5587    | 0.351883  | 4.23972 |
| C | 0.807899  | -0.938559 | 4.31015 |
| H | 1.19364   | -1.67165  | 3.58321 |
| H | 0.889991  | -1.39855  | 5.30165 |
| H | -0.251782 | -0.803845 | 4.07641 |
| C | 2.91661   | 0.428143  | 4.86381 |
| H | 3.68674   | -0.079004 | 4.25644 |
| H | 3.24919   | 1.463     | 4.99556 |
| H | 2.93463   | -0.0616   | 5.84366 |

CH<sub>2</sub>(.)CH<sub>2</sub>CH<sub>2</sub>CH<sub>2</sub>OOH

|   |           |           |           |
|---|-----------|-----------|-----------|
| H | 0.036716  | 0.020616  | -0.056082 |
| O | -0.011567 | 0.036757  | 0.90935   |
| O | 1.40796   | -0.015338 | 1.23048   |
| C | 1.74901   | 1.22413   | 1.85143   |
| H | 1.505     | 2.05126   | 1.17406   |
| H | 2.83948   | 1.15237   | 1.93611   |
| C | 1.10222   | 1.42352   | 3.21728   |
| H | 0.017011  | 1.45701   | 3.08981   |
| H | 1.40846   | 2.40682   | 3.5954    |
| C | 1.47361   | 0.334531  | 4.23401   |
| H | 2.57476   | 0.31061   | 4.33487   |
| H | 1.20666   | -0.646145 | 3.82563   |
| C | 0.84673   | 0.52563   | 5.57093   |
| H | 0.741402  | -0.303759 | 6.25943   |
| H | 0.603297  | 1.51736   | 5.93539   |

CH<sub>3</sub>CH(.)CH<sub>2</sub>CH<sub>2</sub>CH<sub>2</sub>OOH

|   |           |           |          |
|---|-----------|-----------|----------|
| H | -0.043978 | -0.037337 | 0.079314 |
| O | 0.017994  | -0.04584  | 1.04407  |
| O | 1.46462   | 0.016384  | 1.20112  |
| C | 1.77342   | 1.27086   | 1.80927  |
| H | 1.38477   | 2.08417   | 1.18463  |
| H | 2.86851   | 1.28996   | 1.76476  |
| C | 1.27773   | 1.3949    | 3.2451   |
| H | 0.186092  | 1.33421   | 3.24494  |
| H | 1.53994   | 2.39705   | 3.60641  |
| C | 1.85754   | 0.33119   | 4.1866   |
| H | 1.63615   | -0.664737 | 3.78312  |
| H | 2.96192   | 0.405567  | 4.16734  |
| C | 1.36302   | 0.434182  | 5.59056  |
| C | 1.56625   | -0.672785 | 6.56755  |
| H | 1.05114   | 1.40696   | 5.96014  |

|   |          |           |         |
|---|----------|-----------|---------|
| H | 2.61654  | -0.746889 | 6.89832 |
| H | 0.959794 | -0.540571 | 7.46721 |
| H | 1.31713  | -1.6466   | 6.12864 |

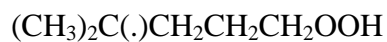

|   |           |           |           |
|---|-----------|-----------|-----------|
| H | 0.037156  | 0.01167   | -0.056303 |
| O | -0.008051 | 0.039825  | 0.908995  |
| O | 1.41244   | -0.00946  | 1.22656   |
| C | 1.75763   | 1.23915   | 1.82638   |
| H | 1.51233   | 2.05514   | 1.13549   |
| H | 2.8483    | 1.16749   | 1.90872   |
| C | 1.11586   | 1.46149   | 3.19155   |
| H | 0.029869  | 1.47345   | 3.0663    |
| H | 1.4084    | 2.45716   | 3.54493   |
| C | 1.51709   | 0.388729  | 4.23488   |
| H | 2.6086    | 0.417461  | 4.35448   |
| H | 1.2695    | -0.59171  | 3.81501   |
| C | 0.856651  | 0.560256  | 5.56953   |
| C | -0.541813 | 0.067064  | 5.76769   |
| H | -0.750363 | -0.815756 | 5.15642   |
| H | -0.733747 | -0.188816 | 6.81603   |
| H | -1.2961   | 0.826152  | 5.49555   |
| C | 1.40964   | 1.54999   | 6.54581   |
| H | 2.49864   | 1.63089   | 6.47002   |
| H | 1.00459   | 2.56558   | 6.38945   |
| H | 1.15996   | 1.28025   | 7.57811   |

2f) Ketohydroperoxydes

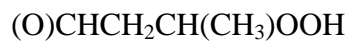

|   |           |           |           |
|---|-----------|-----------|-----------|
| C | -0.004949 | 0.005678  | -0.002709 |
| O | 0.00067   | 0.005655  | 1.20384   |
| H | 0.952827  | 0.008105  | -0.568907 |
| C | -1.24021  | 0.016261  | -0.866079 |
| H | -1.18843  | -0.835154 | -1.55786  |
| H | -1.18738  | 0.911055  | -1.49818  |
| C | -2.56411  | 0.014904  | -0.102073 |
| H | -2.54515  | 0.80523   | 0.656286  |
| C | -2.89939  | -1.32082  | 0.547885  |
| H | -2.94453  | -2.11376  | -0.203158 |
| H | -2.13187  | -1.5669   | 1.28251   |
| H | -3.86552  | -1.26736  | 1.05299   |
| O | -3.65781  | 0.266458  | -0.999496 |



|   |          |         |          |
|---|----------|---------|----------|
| O | -3.50726 | 1.61084 | -1.531   |
| H | -4.22134 | 2.06335 | -1.06134 |

(O)C(CH<sub>3</sub>)CH<sub>2</sub>CH<sub>2</sub>OOH

|   |           |           |           |
|---|-----------|-----------|-----------|
| H | -0.031853 | 0.041053  | -0.007785 |
| O | -0.016733 | 0.023145  | 0.969522  |
| O | 1.40819   | -0.027212 | 1.21792   |
| C | 1.9843    | 1.23448   | 0.904846  |
| H | 1.2233    | 2.01031   | 1.01902   |
| H | 2.76109   | 1.39886   | 1.65911   |
| C | 2.64144   | 1.27459   | -0.480776 |
| H | 3.36685   | 0.452907  | -0.551653 |
| H | 3.23046   | 2.1945    | -0.580755 |
| C | 1.73277   | 1.14002   | -1.6928   |
| O | 0.608672  | 0.680984  | -1.63293  |
| C | 2.31044   | 1.59734   | -3.01445  |
| H | 3.32798   | 1.22085   | -3.15146  |
| H | 1.67191   | 1.26754   | -3.8325   |
| H | 2.37004   | 2.69115   | -3.02293  |

2g) Transition states for the formation of cyclic ethers

CH<sub>2</sub>(.)CH<sub>2</sub>OOH → oxirane + OH

|   |           |           |           |
|---|-----------|-----------|-----------|
| C | 0         | 0         | 0         |
| H | 0         | 0         | 1.09312   |
| H | 1.0182    | 0         | -0.398832 |
| C | -0.948712 | -0.934579 | -0.632297 |
| H | -0.836001 | -1.20835  | -1.67184  |
| H | -1.85158  | -1.2217   | -0.112179 |
| O | -0.826725 | 0.981605  | -0.556658 |
| O | -0.316463 | 2.53072   | 0.093583  |
| H | -1.22015  | 2.87584   | 0.129775  |

CH<sub>3</sub>CH(.)CH<sub>2</sub>OOH → 2-methyl-oxirane + OH

|   |           |           |           |
|---|-----------|-----------|-----------|
| C | 0         | 0         | 0         |
| H | 0         | 0         | 1.09542   |
| H | 1.02142   | 0         | -0.392536 |
| C | -0.928556 | -0.955767 | -0.634382 |
| H | -0.738691 | -1.22386  | -1.66704  |
| O | -0.815357 | 0.986688  | -0.562135 |
| O | -0.081913 | 2.54209   | -0.19115  |
| H | -0.277695 | 2.8995    | -1.06875  |
| C | -2.16358  | -1.44619  | 0.024414  |

|   |          |           |           |
|---|----------|-----------|-----------|
| H | -3.0444  | -1.30393  | -0.609322 |
| H | -2.08586 | -2.52689  | 0.214871  |
| H | -2.33456 | -0.945377 | 0.978527  |

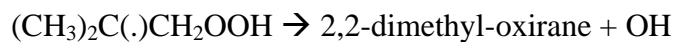

|   |           |           |           |
|---|-----------|-----------|-----------|
| C | 0         | 0         | 0         |
| H | 0         | 0         | 1.09559   |
| H | 1.02515   | 0         | -0.387138 |
| C | -0.917203 | -0.974216 | -0.633179 |
| O | -0.807323 | 0.993422  | -0.557948 |
| O | -0.134751 | 2.53802   | -0.05083  |
| H | -1.00649  | 2.9537    | 0.00274   |
| C | -2.12608  | -1.4504   | 0.09636   |
| H | -3.02907  | -1.35611  | -0.515787 |
| H | -2.02244  | -2.51831  | 0.339922  |
| H | -2.27693  | -0.905045 | 1.02834   |
| C | -0.672659 | -1.43403  | -2.02915  |
| H | -0.372346 | -2.49268  | -2.0299   |
| H | -1.57819  | -1.36442  | -2.6404   |
| H | 0.1182    | -0.857591 | -2.5094   |

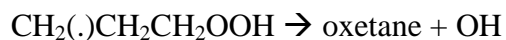

|   |           |           |           |
|---|-----------|-----------|-----------|
| C | 0         | 0         | 0         |
| H | 0         | 0         | 1.09164   |
| H | 1.03331   | 0         | -0.361967 |
| C | -0.870689 | -1.07146  | -0.665253 |
| H | -1.60597  | -1.47892  | 0.030591  |
| H | -0.292807 | -1.89956  | -1.08656  |
| O | -0.694787 | 1.16016   | -0.502356 |
| O | 0.166311  | 2.40022   | 0.261575  |
| C | -1.53033  | -0.206511 | -1.70654  |
| H | -1.02982  | -0.024881 | -2.6492   |
| H | -2.59235  | -0.004245 | -1.67395  |
| H | -0.588558 | 3.00274   | 0.299978  |

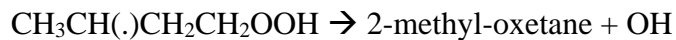

|   |           |          |           |
|---|-----------|----------|-----------|
| C | 0         | 0        | 0         |
| H | 0         | 0        | 1.09185   |
| H | 1.03499   | 0        | -0.359106 |
| C | -0.861173 | -1.08203 | -0.657198 |
| H | -1.61233  | -1.46937 | 0.035263  |
| H | -0.27969  | -1.92587 | -1.0437   |
| O | -0.694108 | 1.15762  | -0.499854 |

|   |           |           |           |
|---|-----------|-----------|-----------|
| O | 0.110118  | 2.38664   | 0.342648  |
| C | -1.51027  | -0.252884 | -1.73613  |
| H | -0.928969 | -0.067111 | -2.63332  |
| H | -0.61339  | 3.02108   | 0.254994  |
| C | -2.97773  | -0.033652 | -1.81156  |
| H | -3.21579  | 0.87368   | -2.37297  |
| H | -3.47636  | -0.871196 | -2.32539  |
| H | -3.41758  | 0.046717  | -0.814393 |

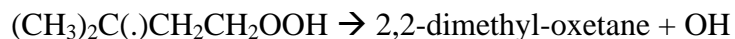

|   |           |           |           |
|---|-----------|-----------|-----------|
| C | 0         | 0         | 0         |
| H | 0         | 0         | 1.0922    |
| H | 1.03684   | 0         | -0.353439 |
| C | -0.857528 | -1.09521  | -0.643823 |
| H | -1.56009  | -1.52602  | 0.073106  |
| H | -0.26379  | -1.90974  | -1.07319  |
| O | -0.688832 | 1.15872   | -0.498136 |
| O | 0.162288  | 2.38157   | 0.299175  |
| C | -1.58709  | -0.281962 | -1.69266  |
| H | -0.55987  | 3.02093   | 0.24432   |
| C | -3.05698  | -0.061808 | -1.57198  |
| H | -3.36999  | 0.83364   | -2.11645  |
| H | -3.61602  | -0.911111 | -1.99834  |
| H | -3.36064  | 0.041554  | -0.528526 |
| C | -0.948514 | -0.095886 | -3.02913  |
| H | -1.22828  | -0.916672 | -3.70931  |
| H | -1.2745   | 0.837151  | -3.49661  |
| H | 0.14088   | -0.082644 | -2.95982  |

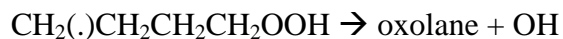

|   |           |          |           |
|---|-----------|----------|-----------|
| C | 0         | 0        | 0         |
| H | 0         | 0        | 1.09252   |
| H | 1.03997   | 0        | -0.351789 |
| C | -0.765343 | -1.1991  | -0.551038 |
| H | -1.72892  | -1.28208 | -0.038287 |
| H | -0.208196 | -2.12303 | -0.36309  |
| O | -0.659595 | 1.18121  | -0.455254 |
| O | 0.094047  | 2.33867  | 0.47607   |
| C | -1.0021   | -0.96904 | -2.05472  |
| H | -1.65138  | -1.76099 | -2.45379  |
| H | -0.051906 | -1.02807 | -2.59371  |
| C | -1.61549  | 0.377652 | -2.22468  |
| H | -1.22865  | 1.08152  | -2.94878  |

|   |          |          |          |
|---|----------|----------|----------|
| H | -2.623   | 0.550103 | -1.86663 |
| H | -0.54309 | 3.03555  | 0.269033 |

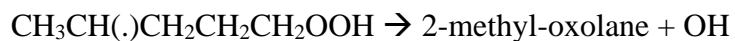

|   |           |           |           |
|---|-----------|-----------|-----------|
| C | -0.02336  | 0.001958  | -0.07439  |
| H | -0.060389 | 0.126887  | 1.01077   |
| H | 1.02878   | -0.063759 | -0.381773 |
| C | -0.796739 | -1.24016  | -0.512178 |
| H | -1.77564  | -1.24995  | -0.021872 |
| H | -0.262819 | -2.14388  | -0.199212 |
| O | -0.633161 | 1.13288   | -0.691697 |
| O | 0.152368  | 2.37931   | 0.08019   |
| C | -0.987981 | -1.18876  | -2.03617  |
| H | -1.61434  | -2.03259  | -2.36186  |
| H | -0.019993 | -1.29746  | -2.53768  |
| C | -1.60939  | 0.119705  | -2.39414  |
| H | -0.562076 | 3.01646   | -0.052462 |
| H | -2.60729  | 0.305234  | -2.0086   |
| C | -1.15383  | 0.942777  | -3.54614  |
| H | -1.56641  | 0.567316  | -4.49614  |
| H | -1.47794  | 1.98138   | -3.44449  |
| H | -0.064386 | 0.931208  | -3.63648  |

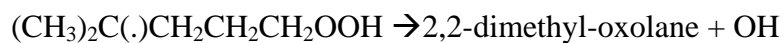

|   |           |           |           |
|---|-----------|-----------|-----------|
| C | 0         | 0         | 0         |
| H | 0         | 0         | 1.09318   |
| H | 1.04225   | 0         | -0.347483 |
| C | -0.761184 | -1.20853  | -0.537891 |
| H | -1.7218   | -1.28855  | -0.020964 |
| H | -0.20242  | -2.12755  | -0.330372 |
| O | -0.665374 | 1.17094   | -0.460268 |
| O | -0.019735 | 2.316     | 0.559902  |
| C | -0.991537 | -1.0218   | -2.04789  |
| H | -1.64061  | -1.82531  | -2.42634  |
| H | -0.035271 | -1.10822  | -2.57371  |
| C | -1.60081  | 0.325638  | -2.3077   |
| H | -0.316595 | 3.07294   | 0.03745   |
| C | -3.04179  | 0.544962  | -1.97408  |
| H | -3.22521  | 1.58528   | -1.69119  |
| H | -3.67915  | 0.330696  | -2.84751  |
| H | -3.38171  | -0.092013 | -1.15554  |
| C | -0.986762 | 1.228     | -3.32745  |
| H | -1.30746  | 0.948297  | -4.34442  |

|   |          |         |          |
|---|----------|---------|----------|
| H | -1.29117 | 2.26687 | -3.17274 |
| H | 0.104095 | 1.18121 | -3.30339 |

## 2h) Cyclic ethers

### oxirane

|   |           |           |           |
|---|-----------|-----------|-----------|
| C | 0.038239  | -0.032368 | 0.029152  |
| H | 0.010291  | -0.005069 | 1.11599   |
| H | 1.03166   | -0.00354  | -0.412443 |
| C | -1.0646   | -0.658713 | -0.708791 |
| H | -0.878442 | -1.08797  | -1.6905   |
| H | -1.89993  | -1.08981  | -0.161985 |
| O | -0.948611 | 0.763241  | -0.629444 |

### 2-methyl-oxirane

|   |           |           |           |
|---|-----------|-----------|-----------|
| C | 0.054714  | -0.058636 | 0.04266   |
| H | 0.001874  | -0.016209 | 1.12862   |
| H | 1.05749   | -0.022432 | -0.377114 |
| C | -1.0302   | -0.709196 | -0.702548 |
| H | -0.784336 | -1.1224   | -1.68061  |
| O | -0.92936  | 0.720071  | -0.648443 |
| C | -2.22108  | -1.3255   | -0.017735 |
| H | -3.12292  | -1.1929   | -0.622122 |
| H | -2.06969  | -2.39876  | 0.133488  |
| H | -2.39109  | -0.85606  | 0.953709  |

### 2,2-dimethyl-oxirane

|   |           |           |           |
|---|-----------|-----------|-----------|
| C | 0.058111  | -0.063947 | 0.039661  |
| H | 0.01912   | -0.026919 | 1.12643   |
| H | 1.05649   | -0.013486 | -0.390025 |
| C | -1.02348  | -0.725841 | -0.705653 |
| O | -0.940884 | 0.711135  | -0.636943 |
| C | -2.19508  | -1.32133  | 0.043221  |
| H | -3.11326  | -1.21385  | -0.542244 |
| H | -2.03821  | -2.38767  | 0.232558  |
| H | -2.33976  | -0.814074 | 0.998559  |
| C | -0.746341 | -1.30334  | -2.07589  |
| H | -0.504178 | -2.36855  | -2.01091  |
| H | -1.62618  | -1.19548  | -2.71745  |
| H | 0.087028  | -0.783709 | -2.55166  |

### oxetane

|   |           |           |           |
|---|-----------|-----------|-----------|
| C | -0.029868 | -0.008185 | -0.027945 |
|---|-----------|-----------|-----------|

|   |           |           |           |
|---|-----------|-----------|-----------|
| H | -0.246562 | 0.186872  | 1.02744   |
| H | 1.05495   | -0.050743 | -0.169915 |
| C | -0.835512 | -1.15157  | -0.677013 |
| H | -1.54046  | -1.65727  | -0.017161 |
| H | -0.242389 | -1.89396  | -1.21093  |
| O | -0.644682 | 0.977664  | -0.891893 |
| C | -1.4388   | -0.035915 | -1.554    |
| H | -1.20992  | -0.095456 | -2.62309  |
| H | -2.51145  | 0.142133  | -1.42568  |

2-methyl-oxetane

|   |           |           |           |
|---|-----------|-----------|-----------|
| C | -0.087325 | 0.013158  | -0.043105 |
| H | -0.2796   | 0.193589  | 1.01853   |
| H | 0.994714  | 0.004095  | -0.215672 |
| C | -0.857786 | -1.14894  | -0.695687 |
| H | -1.6119   | -1.60884  | -0.054718 |
| H | -0.25446  | -1.92773  | -1.16244  |
| O | -0.754583 | 0.985468  | -0.881643 |
| C | -1.42027  | -0.062973 | -1.64112  |
| H | -0.998787 | -0.115865 | -2.65328  |
| C | -2.91871  | 0.138139  | -1.70861  |
| H | -3.15216  | 1.07647   | -2.21898  |
| H | -3.39219  | -0.679697 | -2.26161  |
| H | -3.34785  | 0.178887  | -0.703984 |

2,2-dimethyl-oxetane

|   |           |           |           |
|---|-----------|-----------|-----------|
| C | -0.123879 | 0.016615  | 0.016483  |
| H | -0.408025 | 0.160167  | 1.0639    |
| H | 0.967938  | 0.036976  | -0.062176 |
| C | -0.823122 | -1.14341  | -0.711797 |
| H | -1.54046  | -1.70712  | -0.113964 |
| H | -0.163077 | -1.83774  | -1.23325  |
| O | -0.741984 | 0.998867  | -0.845514 |
| C | -1.4467   | -0.038005 | -1.60666  |
| C | -2.9519   | 0.144069  | -1.47686  |
| H | -3.25581  | 1.09136   | -1.93085  |
| H | -3.48903  | -0.66732  | -1.97833  |
| H | -3.24835  | 0.160385  | -0.425646 |
| C | -0.985048 | -0.03057  | -3.05691  |
| H | -1.44543  | -0.84977  | -3.61841  |
| H | -1.26158  | 0.913552  | -3.53433  |
| H | 0.100755  | -0.135473 | -3.11518  |

## oxolane

|   |           |          |           |
|---|-----------|----------|-----------|
| C | -0.075493 | 0.003247 | -0.054155 |
| H | -0.216074 | 0.18641  | 1.01426   |
| H | 1.00272   | 0.01276  | -0.266056 |
| C | -0.715508 | -1.301   | -0.535887 |
| H | -1.64175  | -1.49777 | 0.012659  |
| H | -0.058674 | -2.16515 | -0.417725 |
| O | -0.717553 | 1.05577  | -0.784227 |
| C | -1.0252   | -0.9649  | -2.00174  |
| H | -1.80928  | -1.5894  | -2.43438  |
| H | -0.124856 | -1.07781 | -2.61325  |
| C | -1.42891  | 0.511167 | -1.90534  |
| H | -1.17072  | 1.08455  | -2.80022  |
| H | -2.50758  | 0.616377 | -1.73048  |

## 2-methyl-oxolane

|   |           |           |           |
|---|-----------|-----------|-----------|
| C | -0.284329 | -0.061832 | 0.150399  |
| H | -0.81108  | -0.279227 | 1.08719   |
| H | 0.695978  | 0.356136  | 0.40029   |
| C | -0.185786 | -1.30968  | -0.741566 |
| H | -0.177568 | -2.23756  | -0.166197 |
| H | 0.726385  | -1.28061  | -1.34481  |
| O | -1.04105  | 0.910784  | -0.583716 |
| C | -1.41882  | -1.16036  | -1.64159  |
| H | -2.3195   | -1.50962  | -1.12508  |
| H | -1.3352   | -1.70179  | -2.58636  |
| C | -1.48711  | 0.358188  | -1.83445  |
| H | -0.775896 | 0.654081  | -2.62192  |
| C | -2.8581   | 0.925684  | -2.1591   |
| H | -2.81943  | 2.01662   | -2.19454  |
| H | -3.20801  | 0.562743  | -3.13009  |
| H | -3.58109  | 0.634235  | -1.39258  |

## 2,2-dimethyl-oxolane

|   |           |           |          |
|---|-----------|-----------|----------|
| H | -0.043978 | -0.037337 | 0.079314 |
| O | 0.017994  | -0.04584  | 1.04407  |
| O | 1.46462   | 0.016384  | 1.20112  |
| C | 1.77342   | 1.27086   | 1.80927  |
| H | 1.38477   | 2.08417   | 1.18463  |
| H | 2.86851   | 1.28996   | 1.76476  |
| C | 1.27773   | 1.3949    | 3.2451   |
| H | 0.186092  | 1.33421   | 3.24494  |
| H | 1.53994   | 2.39705   | 3.60641  |

|   |          |           |         |
|---|----------|-----------|---------|
| C | 1.85754  | 0.33119   | 4.1866  |
| H | 1.63615  | -0.664737 | 3.78312 |
| H | 2.96192  | 0.405567  | 4.16734 |
| C | 1.36302  | 0.434182  | 5.59056 |
| C | 1.56625  | -0.672785 | 6.56755 |
| H | 1.05114  | 1.40696   | 5.96014 |
| H | 2.61654  | -0.746889 | 6.89832 |
| H | 0.959794 | -0.540571 | 7.46721 |
| H | 1.31713  | -1.6466   | 6.12864 |

### 3) Species involved in the isomerization of one hydroperoxyalkyl radical into another hydroperoxyalkyl radical

1-hydroperoxy-4-butyl radical

|   |           |           |           |
|---|-----------|-----------|-----------|
| H | 0.036716  | 0.020616  | -0.056082 |
| O | -0.011567 | 0.036757  | 0.90935   |
| O | 1.40796   | -0.015338 | 1.23048   |
| C | 1.74901   | 1.22413   | 1.85143   |
| H | 1.505     | 2.05126   | 1.17406   |
| H | 2.83948   | 1.15237   | 1.93611   |
| C | 1.10222   | 1.42352   | 3.21728   |
| H | 0.017011  | 1.45701   | 3.08981   |
| H | 1.40846   | 2.40682   | 3.5954    |
| C | 1.47361   | 0.334531  | 4.23401   |
| H | 2.57476   | 0.31061   | 4.33487   |
| H | 1.20666   | -0.646145 | 3.82563   |
| C | 0.84673   | 0.52563   | 5.57093   |



|   |          |           |         |
|---|----------|-----------|---------|
| H | 0.741402 | -0.303759 | 6.25943 |
| H | 0.603297 | 1.51736   | 5.93539 |

CH<sub>2</sub>(.)CH<sub>2</sub>CH<sub>2</sub>CH<sub>2</sub>OOH → butanal + OH

|   |          |           |          |
|---|----------|-----------|----------|
| H | 0        | 0         | 0        |
| O | 0        | 0         | 0.967287 |
| O | 1.49696  | 0         | 1.18858  |
| C | 1.82042  | 1.17127   | 1.83486  |
| H | 1.64073  | 2.06465   | 1.22925  |
| H | 3.13829  | 0.997281  | 2.06289  |
| C | 1.48243  | 1.24221   | 3.31995  |
| H | 0.471592 | 0.87901   | 3.51945  |
| H | 1.53048  | 2.28914   | 3.63917  |
| C | 2.58811  | 0.418056  | 4.019    |
| H | 2.35461  | -0.646041 | 3.93475  |
| H | 2.67119  | 0.652406  | 5.08486  |
| C | 3.86179  | 0.724413  | 3.24558  |
| H | 4.34342  | 1.67824   | 3.45967  |
| H | 4.56572  | -0.080546 | 3.05128  |

butanal

|   |           |           |           |
|---|-----------|-----------|-----------|
| C | -0.022214 | -0.103647 | 0.030971  |
| O | -0.159881 | -0.214375 | 1.22286   |
| C | 1.29912   | 0.095541  | -0.672504 |
| H | 1.39536   | -0.714071 | -1.41114  |
| H | 1.20863   | 1.01095   | -1.27563  |
| C | 2.51402   | 0.154613  | 0.251647  |
| H | 2.5563    | -0.765611 | 0.841662  |
| H | 2.37071   | 0.962724  | 0.97501   |
| C | 3.82794   | 0.354295  | -0.507483 |
| H | 4.6766    | 0.39547   | 0.179859  |
| H | 4.01139   | -0.464087 | -1.21081  |
| H | 3.82073   | 1.28688   | -1.08048  |
| H | -0.906259 | -0.144899 | -0.645264 |

#### 4) Species involved in the beta-scission reactions

1-hydroperoxy-3-butyl radical

|   |           |           |          |
|---|-----------|-----------|----------|
| H | -0.019542 | -0.001948 | 0.028619 |
| O | 0.006084  | 0.017728  | 0.994861 |
| O | 1.44689   | -0.006049 | 1.20615  |
| C | 1.76623   | -1.24927  | 1.82776  |
| H | 2.86113   | -1.2377   | 1.83272  |
| H | 1.42229   | -2.07541  | 1.19398  |
| C | 1.21647   | -1.37988  | 3.24798  |
| H | 1.47625   | -2.37895  | 3.62582  |
| H | 0.116     | -1.36738  | 3.18174  |
| C | 1.70615   | -0.324376 | 4.18147  |
| H | 1.91154   | 0.65571   | 3.7648   |
| C | 1.56881   | -0.472692 | 5.65763  |
| H | 1.88148   | -1.46785  | 5.99755  |
| H | 2.15973   | 0.27124   | 6.19793  |

|   |         |           |         |
|---|---------|-----------|---------|
| H | 0.52328 | -0.351193 | 5.98933 |
|---|---------|-----------|---------|

2-hydroperoxy-4-butyl radical

|   |           |           |           |
|---|-----------|-----------|-----------|
| H | -0.047149 | 0.104983  | 0.095828  |
| O | 0.016655  | 0.112624  | 1.05995   |
| O | 1.46121   | -0.013864 | 1.22035   |
| C | 1.7438    | -1.2895   | 1.81992   |
| H | 2.83607   | -1.2318   | 1.89223   |
| C | 1.15142   | -1.39205  | 3.2344    |
| H | 1.40015   | -2.37726  | 3.64587   |
| H | 0.05456   | -1.37892  | 3.12868   |
| C | 1.60252   | -0.310224 | 4.15147   |
| H | 1.62011   | -0.46308  | 5.22309   |
| H | 1.76106   | 0.689272  | 3.76792   |
| C | 1.34547   | -2.44744  | 0.910077  |
| H | 1.77828   | -2.31588  | -0.084844 |
| H | 1.70754   | -3.39535  | 1.31637   |
| H | 0.259495  | -2.50995  | 0.815935  |

$\text{CH}_3\text{CH}(\cdot)\text{CH}_2\text{CH}_2\text{OOH} \rightarrow \text{propene} + \text{HCHO} + \text{OH}$

|   |           |           |           |
|---|-----------|-----------|-----------|
| C | -0.066542 | 0.032619  | -0.042921 |
| C | 0.086499  | -0.046584 | 1.30871   |
| C | 2.27467   | -0.120267 | 1.90324   |
| O | 2.3596    | -0.081244 | 3.26101   |
| O | 1.84405   | 1.23239   | 3.68966   |
| H | 2.28055   | 1.28462   | 4.55117   |
| C | -0.060157 | 1.31201   | -0.822654 |
| H | -0.128369 | -0.887734 | -0.619871 |
| H | -0.069229 | -0.989344 | 1.82051   |
| H | -0.00348  | 0.840722  | 1.9255    |
| H | 2.69901   | 0.732649  | 1.37786   |
| H | 2.52711   | -1.11958  | 1.56759   |
| H | -0.956038 | 1.40304   | -1.44872  |
| H | -0.02145  | 2.18217   | -0.162252 |
| H | 0.798185  | 1.36884   | -1.50522  |

$\text{CH}_2(\cdot)\text{CH}_2\text{CH}(\text{OOH})\text{CH}_3 \rightarrow \text{ethene} + \text{CH}_3\text{CHO} + \text{OH}$

|   |           |           |           |
|---|-----------|-----------|-----------|
| C | 2.40538   | -0.226698 | 0.145957  |
| C | 1.49053   | 0.535537  | -0.517277 |
| C | -0.462907 | 0.518402  | 0.56997   |
| O | -0.812104 | -0.782157 | 0.748609  |
| O | -0.913708 | -1.43786  | -0.595218 |
| H | -1.62703  | -2.05748  | -0.389929 |

|   |           |          |           |
|---|-----------|----------|-----------|
| H | 3.05057   | 0.194371 | 0.909269  |
| H | 2.45887   | -1.29825 | -0.00553  |
| H | 0.975336  | 0.12922  | -1.37928  |
| H | 1.54519   | 1.61832  | -0.463957 |
| C | -1.37781  | 1.40508  | -0.22304  |
| H | -0.076745 | 0.876009 | 1.51967   |
| H | -2.35989  | 1.4904   | 0.263126  |
| H | -0.955502 | 2.40865  | -0.30854  |
| H | -1.53548  | 1.00496  | -1.22561  |
